# Supplementary material
Source: PubMed Central journal article supplement (PMC307568)

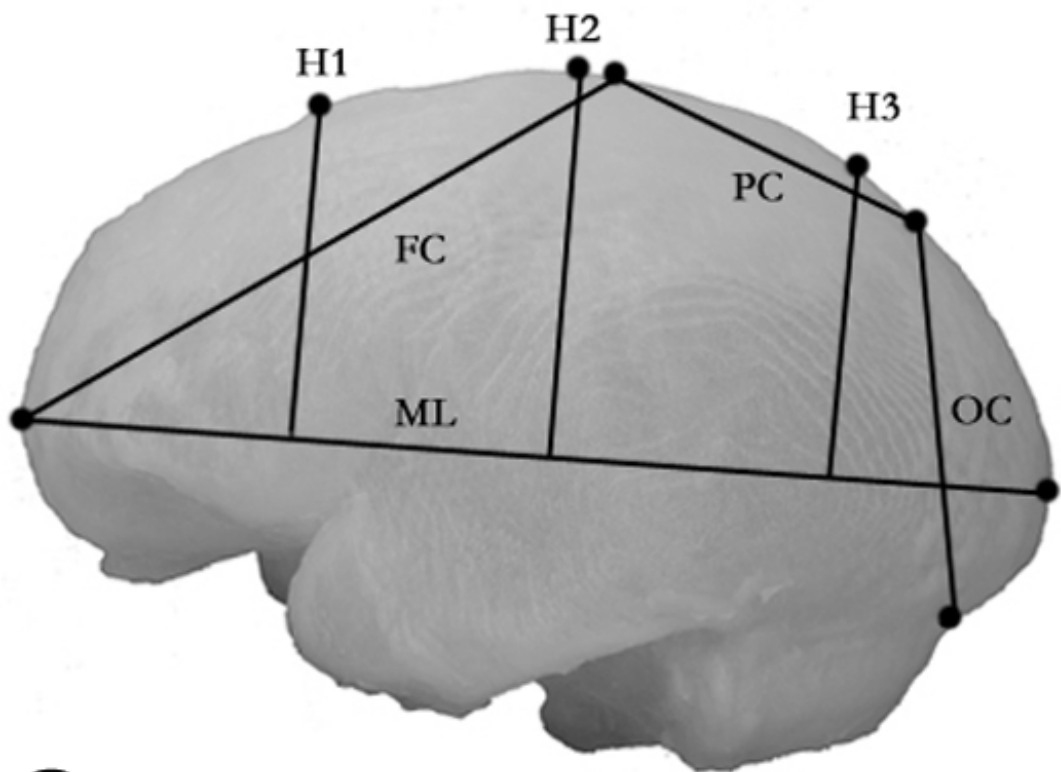

a

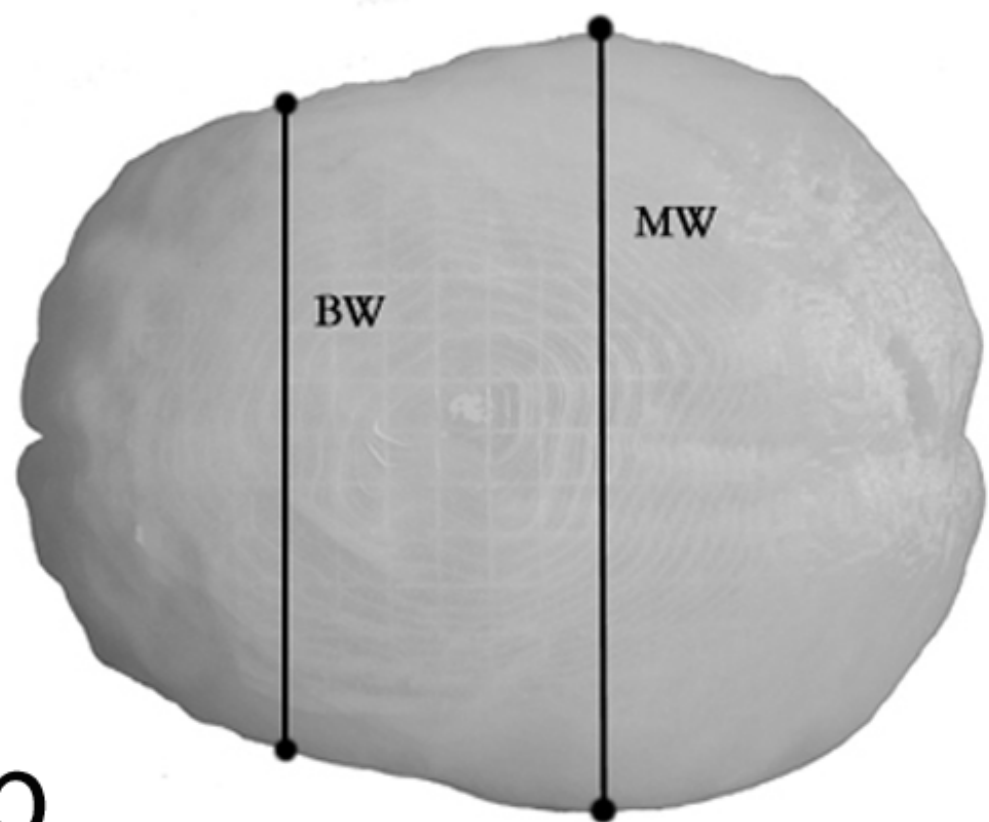

b

Supplement: pnas_100_26_15335__2.pdf [file pnas_100_26_15335__2.pdf]

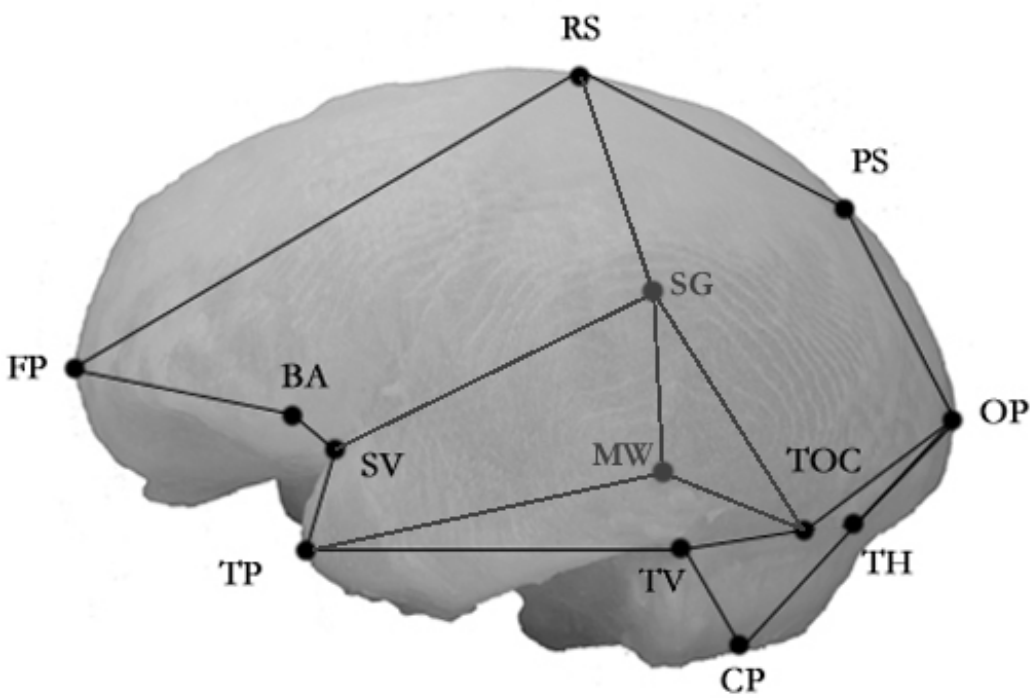

a

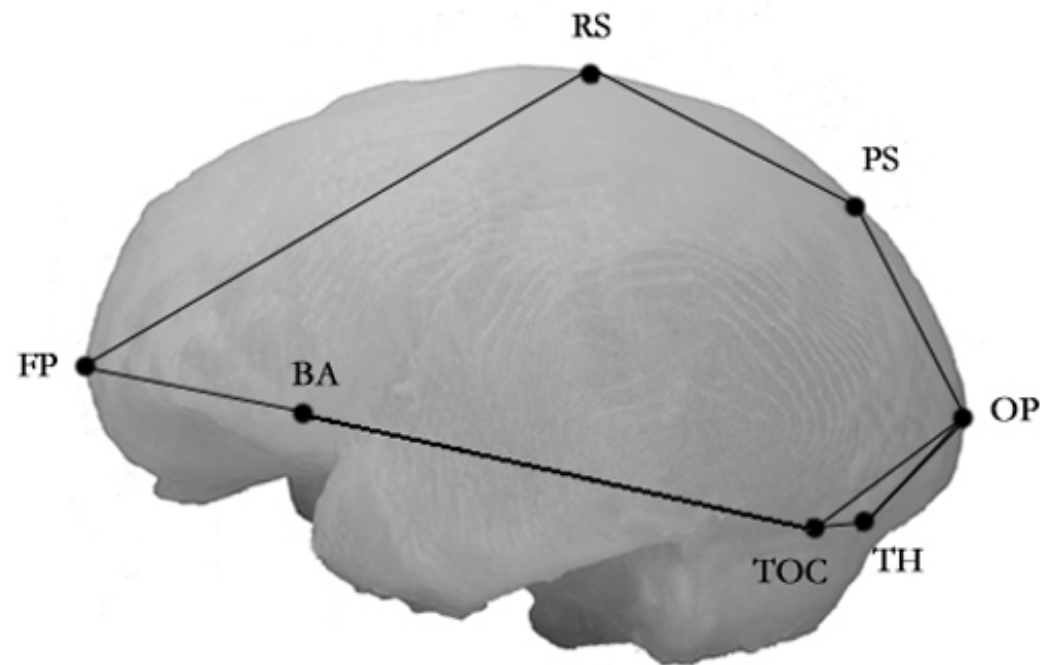

b

Supplement: pnas_100_26_15335__4.pdf [file pnas_100_26_15335__4.pdf]
